# Supplementary material for: Bio-based aromatic copolyesters made from 1,6-hexanediol and bicyclic diacetalized d-glucitol
Source: Royal Society of Chemistry journal article supplement (doi:10.1039/c2py20145c), 2012-01-01
Supplement: c2py20145c.pdf [file c2py20145c.pdf]

## Electronic Supplementary Information

### Bio-based aromatic copolyesters made from 1,6-hexanediol and bicyclic diacetalized D-glucitol

Cristina Japu,<sup>a</sup> Abdelilah Alla,<sup>a</sup> Antxon Martínez de Ilarduya,<sup>a</sup> M<sup>a</sup> Gracia García-Martín,<sup>b</sup> Elena Benito,<sup>b</sup> Juan A. Galbis<sup>b</sup> and Sebastián Muñoz-Guerra<sup>a\*</sup>

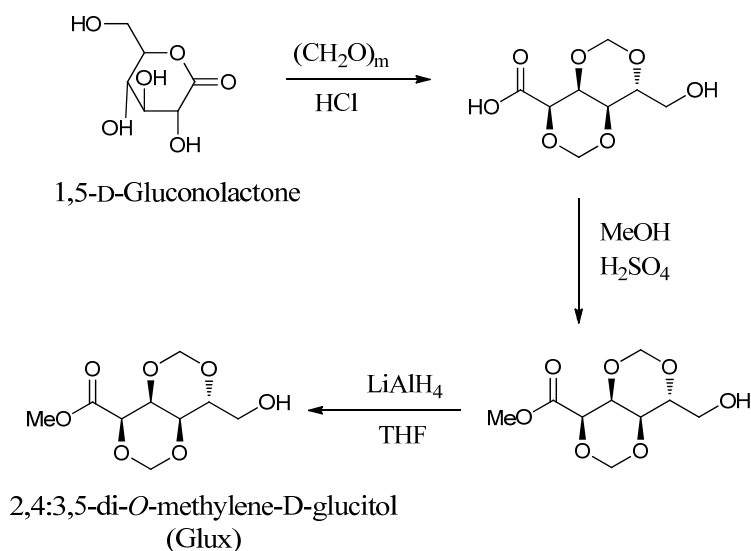

**Scheme S1.** Synthetic route to Glux from 1,5-D-gluconolactone.

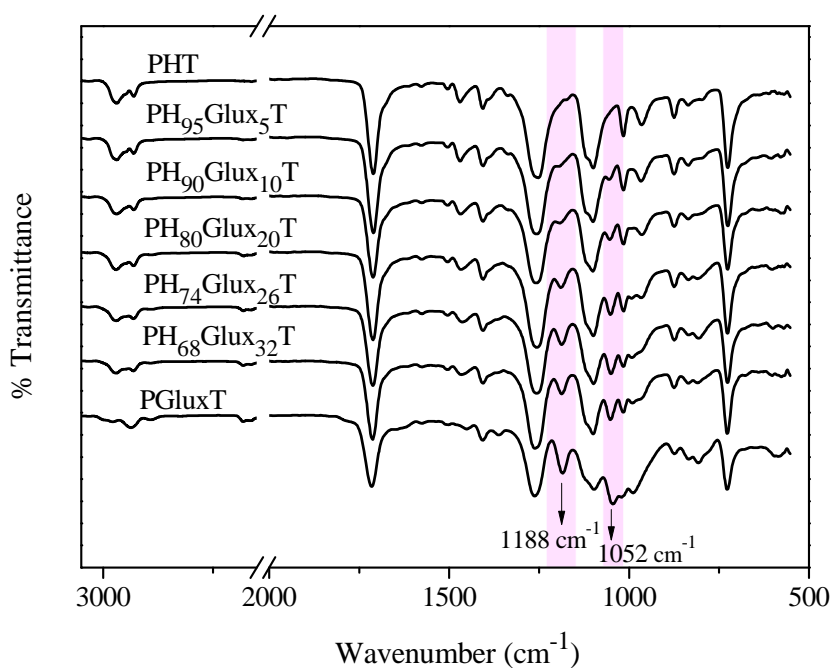

**Figure S1.** FTIR spectra of the indicated polyesters.

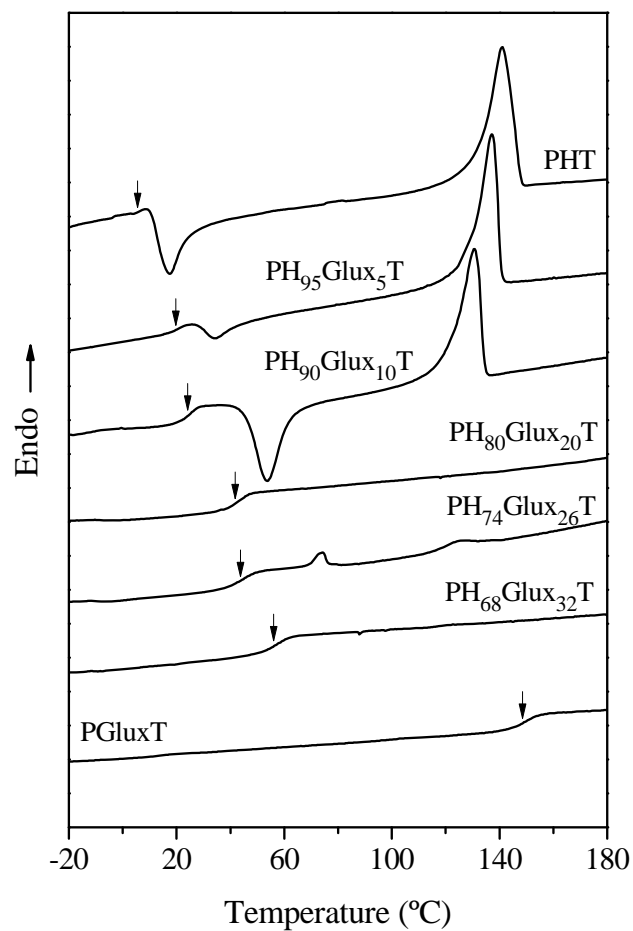

**Figure S2.** DSC traces of polyesters and copolyesters registered at heating from quenched samples . Glass transition temperatures denoted by arrows.

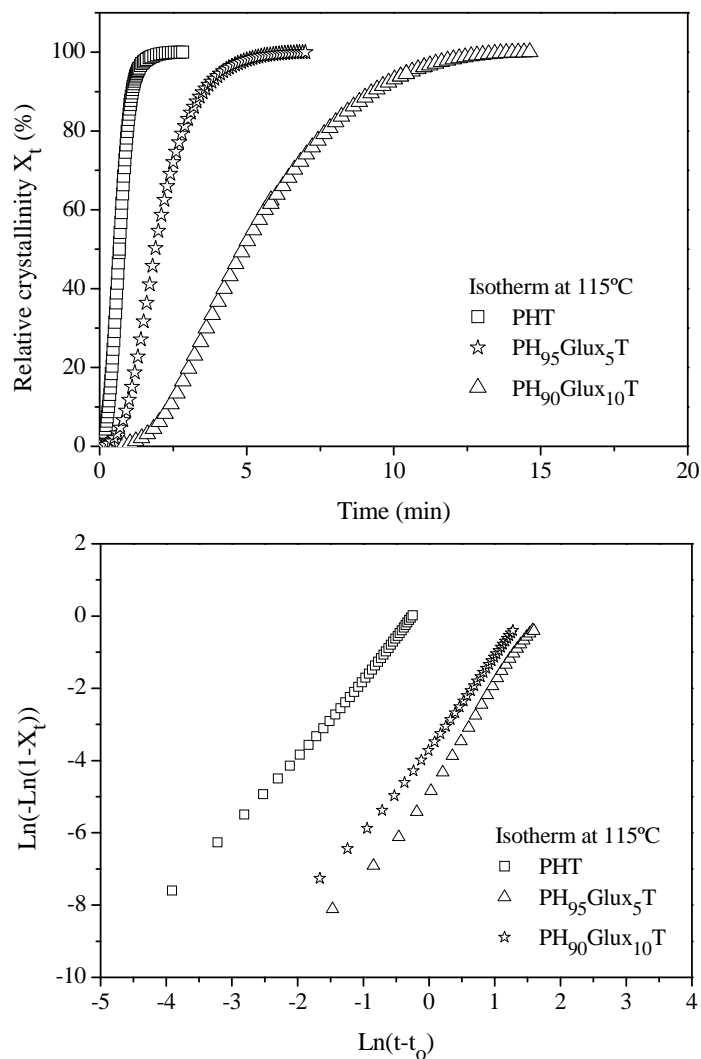

**Figure S3.** Isothermal crystallization at 115 °C of PHT, PH<sub>95</sub>Glux<sub>5</sub>T and PH<sub>90</sub>Glux<sub>10</sub>T. Relative crystallinity vs crystallization time (top) and Avrami plots (bottom).

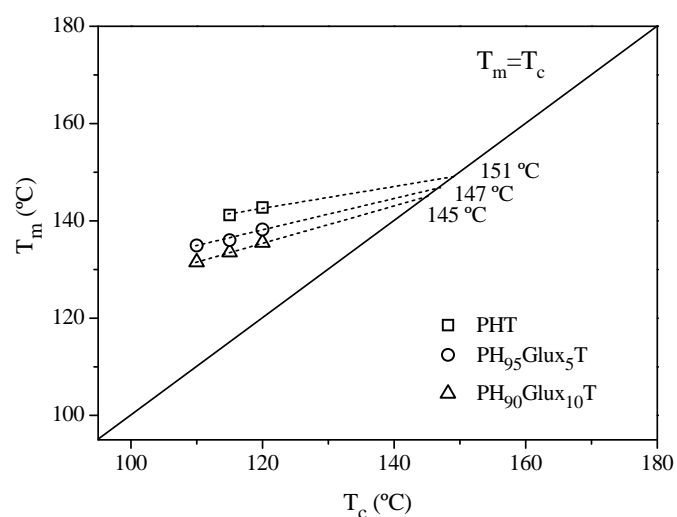

**Figure S4.** Hoffman-Weeks plots for isothermally crystallized PHT, PH<sub>95</sub>Glux<sub>5</sub>T and PH<sub>90</sub>Glux<sub>10</sub>T polyesters.

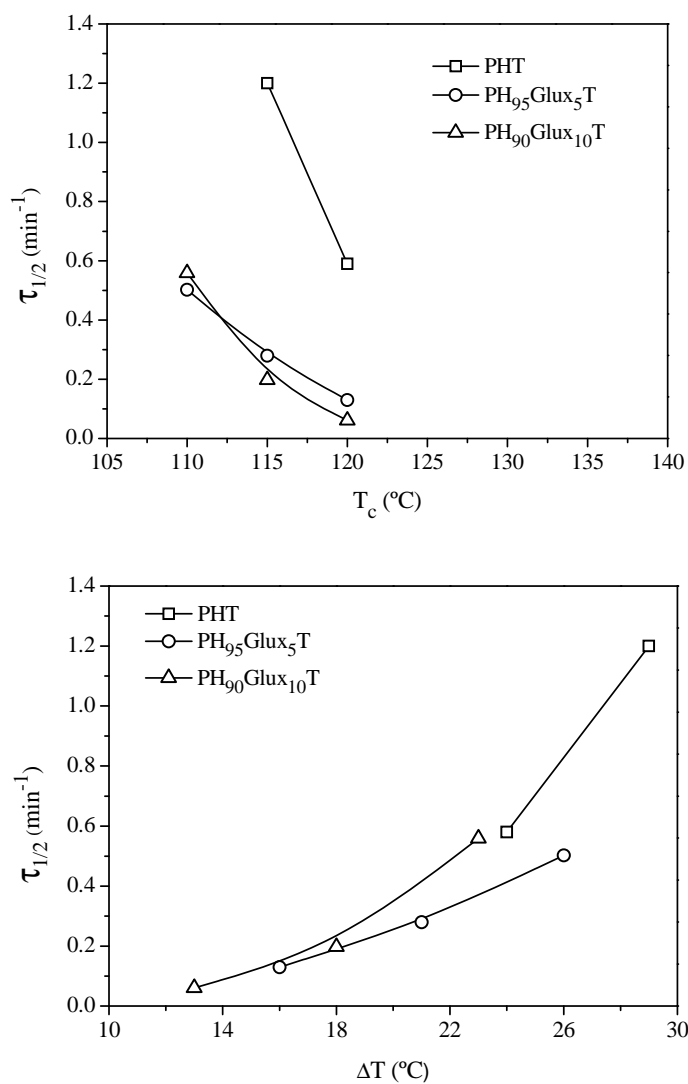

**Figure S5.** Inverse of crystallization half-time vs crystallization temperature (top) and  $\Delta T$  ( $T_m - T_c$ ) for the indicated polyesters.
